# Supplementary material for: The Competing Endogenous RNAs Regulatory Genes Network Mediates Leaf Shape Variation and Main Effector Gene Function in Mulberry Plant (Morus alba)
Source: MDPI journal article supplement (doi:10.3390/ijms242316860), 2023-11-28
Supplement: s1 [file s1]

## Supplementary Materials:

### Supplementary tables

Table S1. Statistics of the number of tested genes in each sample

| sample | refer_genes | sequenced_refer_genes(%) | novel_genes | sequenced_novel_genes(%) | total_genes | sequenced_total_genes(%) |
|--------|-------------|--------------------------|-------------|--------------------------|-------------|--------------------------|
| all    | 21,636      | 17,910 (82.78%)          | 643         | 643 (100.00%)            | 22,279      | 18,553 (83.28%)          |
| CK-1   | 21,636      | 16,092 (74.38%)          | 643         | 590 (91.76%)             | 22,279      | 16,682 (74.88%)          |
| CK-2   | 21,636      | 14,509 (67.06%)          | 643         | 511 (79.47%)             | 22,279      | 15,020 (67.42%)          |
| CK-3   | 21,636      | 15,566 (71.94%)          | 643         | 561 (87.25%)             | 22,279      | 16,127 (72.39%)          |
| HL-1   | 21,636      | 16,513 (76.32%)          | 643         | 595 (92.53%)             | 22,279      | 17,108 (76.79%)          |
| HL-2   | 21,636      | 16,386 (75.73%)          | 643         | 604 (93.93%)             | 22,279      | 16,990 (76.26%)          |
| HL-3   | 21,636      | 15,898 (73.48%)          | 643         | 577 (89.74%)             | 22,279      | 16,475 (73.95%)          |

Table S2. Statistics of the number and tag abundance of new miRNAs identified in each sample

| sample | total_abundance | mirna_num | tags_unique | tags_abundance | ratio(%) |
|--------|-----------------|-----------|-------------|----------------|----------|
| all    | 56,539,678      | 386       | 1072        | 260,765        | 0.46     |
| CK-1   | 8,708,224       | 308       | 704         | 52,170         | 0.60     |
| CK-2   | 8,741,329       | 275       | 588         | 45,565         | 0.52     |
| CK-3   | 6,839,844       | 292       | 781         | 23,581         | 0.34     |
| HL-1   | 7,640,415       | 340       | 757         | 31,073         | 0.41     |
| HL-2   | 10,703,169      | 355       | 803         | 40,986         | 0.38     |
| HL-3   | 13,906,697      | 342       | 794         | 67,390         | 0.48     |

Table S3. Statistics of the number of lncRNA detected in each sample

| sample | Refer_<br>lncRA | Sequenced_Refer_<br>lncRNA(%) | Novel_<br>lncRNAs | sequenced_<br>Novel_lncRNAs(%) | Total_<br>lncRNAs | sequenced_<br>Total_lncRNAs(%) |
|--------|-----------------|-------------------------------|-------------------|--------------------------------|-------------------|--------------------------------|
| all    | 951             | 298 (31.34%)                  | 8,726             | 8,725 (99.99%)                 | 9,677             | 9,023 (93.24%)                 |
| CK-1   | 951             | 180 (18.93%)                  | 8,726             | 6,617 (75.83%)                 | 9,677             | 6,797 (70.24%)                 |
| CK-2   | 951             | 140 (14.72%)                  | 8,726             | 5,685 (65.15%)                 | 9,677             | 5,825 (60.19%)                 |
| CK-3   | 951             | 156 (16.40%)                  | 8,726             | 6,037 (69.18%)                 | 9,677             | 6,193 (64.00%)                 |
| HL-1   | 951             | 186 (19.56%)                  | 8,726             | 6,807 (78.01%)                 | 9,677             | 6,993 (72.26%)                 |
| HL-2   | 951             | 206 (21.66%)                  | 8,726             | 7,194 (82.44%)                 | 9,677             | 7,400 (76.47%)                 |

Table S4. Statistics of the circRNA sequencing reads detected in each sample

| Sample | Total      | Unmapped(%)         | Unique_Mapped(%)    | Multiple_Mapped(%)  | Total_Mapped(%)     |
|--------|------------|---------------------|---------------------|---------------------|---------------------|
| CK-1   | 56,516,478 | 22,319,563 (39.49%) | 16,118,634 (28.52%) | 18,078,281 (31.99%) | 34,196,915 (60.51%) |
| CK-2   | 44,218,836 | 17,466,225 (39.50%) | 11,878,307 (26.86%) | 14,874,304 (33.64%) | 26,752,611 (60.50%) |
| CK-3   | 78,077,398 | 46,984,498 (60.18%) | 14,322,807 (18.34%) | 16,770,093 (21.48%) | 31,092,900 (39.82%) |
| HL-1   | 72,300,802 | 29,570,466 (40.90%) | 20,915,227 (28.93%) | 21,815,109 (30.17%) | 42,730,336 (59.10%) |
| HL-2   | 65,543,296 | 27,629,596 (42.15%) | 19,278,987 (29.41%) | 18,634,713 (28.43%) | 37,913,700 (57.85%) |
| HL-3   | 76,172,430 | 32,365,582 (42.49%) | 20,433,765 (26.83%) | 23,373,083 (30.68%) | 43,806,848 (57.51%) |

Table S5. Differential negative correlation targeted miRNA-mRNA

| miRNA     | CK-1       | CK-2       | CK-3       | HL-1       | HL-2       | HL-3       | mRNA           | CK-1  | CK-2  | CK-3   | HL-1   | HL-2   | HL-3  | rho                | Symbol |
|-----------|------------|------------|------------|------------|------------|------------|----------------|-------|-------|--------|--------|--------|-------|--------------------|--------|
| miR156-x  | 428.7195   | 360.6911   | 5821.0404  | 220.4170   | 178.4761   | 180.9024   | ncbi_21398587  | 3.08  | 0.11  | 0.00   | 13.36  | 9.25   | 8.35  | -0.771428571428571 | SPL3   |
| miR156-x  | 428.7195   | 360.6911   | 5821.0404  | 220.4170   | 178.4761   | 180.9024   | ncbi_21404628  | 0.29  | 0.00  | 0.06   | 1.38   | 1.73   | 4.22  | -0.771428571428571 | SPL7   |
| miR156-x  | 428.7195   | 360.6911   | 5821.0404  | 220.4170   | 178.4761   | 180.9024   | ncbi_21411327  | 0.00  | 0.00  | 0.00   | 0.15   | 0.28   | 0.31  | -0.880406274042429 | SPL6   |
| miR157-x  | 263.4221   | 224.4234   | 5461.6489  | 132.8302   | 99.5044    | 64.2400    | ncbi_21398587  | 3.08  | 0.11  | 0.00   | 13.36  | 9.25   | 8.35  | -0.714285714285714 | SPL3   |
| miR157-x  | 263.4221   | 224.4234   | 5461.6489  | 132.8302   | 99.5044    | 64.2400    | ncbi_21401011  | 1.87  | 0.96  | 1.48   | 5.01   | 4.97   | 5.54  | -0.771428571428571 | SPL14  |
| miR157-x  | 263.4221   | 224.4234   | 5461.6489  | 132.8302   | 99.5044    | 64.2400    | ncbi_21404628  | 0.29  | 0.00  | 0.06   | 1.38   | 1.73   | 4.22  | -0.828571428571429 | SPL7   |
| miR157-x  | 263.4221   | 224.4234   | 5461.6489  | 132.8302   | 99.5044    | 64.2400    | ncbi_21411327  | 0.00  | 0.00  | 0.00   | 0.15   | 0.28   | 0.31  | -0.94112394811432  | SPL6   |
| miR2916-z | 4.2806     | 6.5743     | 6.2913     | 11.6009    | 23.6915    | 49.0891    | ncbi_21401843  | 1.48  | 0.42  | 1.79   | 0.57   | 0.57   | 0.13  | -0.753702346348183 | GOLS2  |
| miR2916-z | 4.2806     | 6.5743     | 6.2913     | 11.6009    | 23.6915    | 49.0891    | ncbi_21403045  | 78.96 | 72.65 | 135.21 | 20.22  | 38.48  | 22.62 | -0.771428571428571 | NIA    |
| miR399-x  | 0.9878     | 1.4942     | 6.2913     | 0.01       | 0.01       | 0.6060     | ncbi_21390492  | 0.13  | 0.00  | 0.06   | 1.52   | 1.33   | 1.27  | -0.927633657043918 | ANT    |
| miR399-x  | 0.9878     | 1.4942     | 6.2913     | 0.01       | 0.01       | 0.6060     | ncbi_21390620  | 0.39  | 0.39  | 0.03   | 1.97   | 1.72   | 3.50  | -0.794117647058823 | --     |
| miR399-x  | 0.9878     | 1.4942     | 6.2913     | 0.01       | 0.01       | 0.6060     | ncbi_21395176  | 0.73  | 0.33  | 0.26   | 3.13   | 3.36   | 3.46  | -0.811679449913428 | rhp16  |
| miR399-x  | 0.9878     | 1.4942     | 6.2913     | 0.01       | 0.01       | 0.6060     | ncbi_21408525  | 28.61 | 10.12 | 18.25  | 55.04  | 51.31  | 47.20 | -0.927633657043918 | FBA3   |
| miR408-y  | 230.1651   | 170.0358   | 228.0602   | 56.8444    | 62.1244    | 85.7544    | ncbi_21406932  | 10.58 | 0.94  | 0.45   | 20.89  | 26.53  | 19.79 | -0.771428571428571 | ARPN   |
| miR482-y  | 29478.2497 | 59255.5360 | 37554.4395 | 24297.4933 | 20012.4881 | 16765.7438 | ncbi_112094938 | 0.00  | 0.00  | 0.00   | 0.08   | 0.08   | 0.28  | -0.925820099772551 | RPPL1  |
| miR529-x  | 7.5734     | 5.3790     | 40.1071    | 0.5800     | 1.0530     | 5.1513     | ncbi_112090714 | 25.29 | 8.13  | 5.89   | 39.07  | 44.80  | 34.24 | -0.885714285714286 | MORF5  |
| miR529-x  | 7.5734     | 5.3790     | 40.1071    | 0.5800     | 1.0530     | 5.1513     | ncbi_21388550  | 30.04 | 9.13  | 10.60  | 57.76  | 57.36  | 55.42 | -0.828571428571429 | nusB   |
| miR529-x  | 7.5734     | 5.3790     | 40.1071    | 0.5800     | 1.0530     | 5.1513     | ncbi_21390050  | 11.57 | 2.55  | 4.29   | 21.06  | 25.89  | 19.79 | -0.771428571428571 | RPL15  |
| miR529-x  | 7.5734     | 5.3790     | 40.1071    | 0.5800     | 1.0530     | 5.1513     | ncbi_21390254  | 49.48 | 20.00 | 36.68  | 112.47 | 105.80 | 80.60 | -0.828571428571429 | RPL21  |

Table S6. The reverse transcription and RT-qPCR primer sequences for 12 mRNAs expression analysis

| Gene            | Primer         | Sequence (5'-3')      |
|-----------------|----------------|-----------------------|
| <i>B</i> -actin | forward primer | CCGTTCTCTCCCTTTACGCC  |
|                 | reverse primer | AGACGGAGAATAGCATGGGGA |
| ncbi_21398587   | forward primer | CTGCCCCGAGTTCAACAACCT |
|                 | reverse primer | GCTGAGGATGACTTGGCGTT  |
| ncbi_21404628   | forward primer | GAACATCGAGCCCCACCATC  |
|                 | reverse primer | CTAGCAGGGACAAACCCGAA  |
| ncbi_21401011   | forward primer | AAGTCATTGTGCGCCGGTCTT |
|                 | reverse primer | GCTTCCTCCGACGCTCATT   |
| ncbi_21401843   | forward primer | GAATTGGAGAGACAGCCCACA |
|                 | reverse primer | CCGGCGTTGAAGTAGAGAGG  |
| ncbi_21403045   | forward primer | TTAGGGTTTTCGCTTCGCT   |
|                 | reverse primer | TCGTCAATGGAAGTCGTGGG  |
| ncbi_112091005  | forward primer | AGCTGAAGAAATGGGGCAGAA |
|                 | reverse primer | TGGGCCGAACACTCATACTC  |
| ncbi_21400106   | forward primer | TGCAGAAAACTTGGGCGGA   |
|                 | reverse primer | CTCTTCACCAAACACCCGAGA |

|               |                |                       |
|---------------|----------------|-----------------------|
| ncbi_21390050 | forward primer | GCAAGAGGCCGTTCCAAAG   |
|               | reverse primer | GACCACCCAGCTTACGTCC   |
| ncbi_21390254 | forward primer | TTGTTTTTCCTGGGCGGTTT  |
|               | reverse primer | GCTTGCCAATGTATGTGCTGT |
| ncbi_21390777 | forward primer | CCGTGCTCAAGTGTGCTTC   |
|               | reverse primer | TTCAAATCCCCCTCCGCAA   |
| ncbi_21395231 | forward primer | TTCCCCGAATGGGTTTCCAC  |
|               | reverse primer | CTCCACGGCCTCCGAAATAG  |
| ncbi_21389036 | forward primer | GTCCTCTCTTGCGACGGCTT  |
|               | reverse primer | ATCGGAGGTTAGGCTTGTGAG |

Table S7. The stem-loop reverse transcription and RT-qPCR primer sequences for 10 miRNAs expression analysis

| Gene      | Primer              | Sequence (5'-3')                                       |
|-----------|---------------------|--------------------------------------------------------|
| U6        | forward primer      | GGGGACATCCGATAA                                        |
|           | reverse primer      | ATTTGGACCATTCTC                                        |
| universal | reverse primer      | CCAGTGCAGGGTCCGAGGTAT                                  |
| miR529-x  | stem-loop RT primer | GTCGTATCCAGTGCAGGGTCCGAGG<br>TATTCGCACTGGATACGACGCTGTA |
|           | forward primer      | GCGCGCGAAGAGAGAGAG                                     |
| miR156-x  | stem-loop RT primer | GTCGTATCCAGTGCAGGGTCCGAGG<br>TATTCGCACTGGATACGACGTGCTC |
|           | forward primer      | GCGCGCTTGACAGAAGATAGA                                  |
| miR2916-z | stem-loop RT primer | GTCGTATCCAGTGCAGGGTCCGAGG<br>TATTCGCACTGGATACGACTGATCG |
|           | forward primer      | CCACACTGGGGCTCGAAGA                                    |
| miR319-y  | stem-loop RT primer | GTCGTATCCAGTGCAGGGTCCGAGG<br>TATTCGCACTGGATACGACGGGAGC |
|           | forward primer      | GAGCGCTTGGACTGAAGGGA                                   |
| miR399-x  | stem-loop RT primer | GTCGTATCCAGTGCAGGGTCCGAGGT<br>ATTCGCACTGGATACGACGCCAAA |

|                |                     |                                                        |
|----------------|---------------------|--------------------------------------------------------|
|                | forward primer      | GCCCCGAGGGCTTCTCTCT                                    |
| novel-m0038-3p | stem-loop RT primer | GTCGTATCCAGTGCAGGGTCCGAGG<br>TATTCGCACTGGATACGACAGGAGC |
|                | forward primer      | GCCCCGGAAGTTTGGTATT                                    |
| miR156-y       | stem-loop RT primer | GTCGTATCCAGTGCAGGGTCCGAGG<br>TATTCGCACTGGATACGACGGATGA |
|                | forward primer      | CTTCCCCTCTCTATGCTTCTG                                  |
| miR166-x       | stem-loop RT primer | GTCGTATCCAGTGCAGGGTCCGAGG<br>TATTCGCACTGGATACGACCCTCGA |
|                | forward primer      | CAACACGGAATGTTGTCTGGC                                  |
| miR168-y       | stem-loop RT primer | GTCGTATCCAGTGCAGGGTCCGAGG<br>TATTCGCACTGGATACGACATTCAG |
|                | forward primer      | AATTAACCCGCCTTGCATCAA                                  |
| miR482-z       | stem-loop RT primer | GTCGTATCCAGTGCAGGGTCCGAGG<br>TATTCGCACTGGATACGACGGTATG |
|                | forward primer      | TAACGATTTTCCCAACACCACC                                 |

Table S8. The reverse transcription and RT-qPCR primer sequences for 9 lncRNAs expression analysis

| Gene            | Primer         | Sequence (5'-3')      |
|-----------------|----------------|-----------------------|
| $\beta$ - actin | forward primer | AAGAGCGGTTCCCTCGGTTG  |
|                 | reverse primer | TGGTTGGAAGAGGACTTGTGG |
| MSTRG.25812.1   | forward primer | TCCCGGTAGCTCTAT       |
|                 | reverse primer | GTCCGACATGGTTGA       |
| MSTRG.2225.1    | forward primer | AGCGTTCCAACCTCCA      |
|                 | reverse primer | ATACACTCGCCACCC       |
| MSTRG.7548.1    | forward primer | AATGAGTGCCGACCTT      |
|                 | reverse primer | TTTGTAAGTGTAGCCTTGT   |
| MSTRG.14005.1   | forward primer | GCTCCTAGCCCTTCT       |
|                 | reverse primer | CTTCAACGACCTTATTT     |
| MSTRG.22209.1   | forward primer | TGACCAGTTGGGAATA      |
|                 | reverse primer | TGTTTGATCGCCTTG       |

|               |                |                  |
|---------------|----------------|------------------|
| MSTRG.20836.1 | forward primer | TAGTCAAAGGAGGGA  |
|               | reverse primer | TAAAGGAATGGTCGT  |
| MSTRG.8298.1  | forward primer | CTCGTCCTTTCCAAC  |
|               | reverse primer | TCTCAGGTCCAGTTTC |
| MSTRG.13866.1 | forward primer | GAGAATACGGAAGCAA |
|               | reverse primer | CAGCCTGACTCCAAAC |
| MSTRG.25454.1 | forward primer | TTCGCTCTTGGTGGTC |
|               | reverse primer | CTGCGTTGCGGTTAT  |

Table S9. The reverse transcription and RT-qPCR primer sequences for 10 circRNAs expression analysis

| Gene              | Primer         | Sequence (5'-3')     |
|-------------------|----------------|----------------------|
| 18S rRNA          | forward primer | GCAAGACCGAAACTCAAAG  |
|                   | reverse primer | TGTCAAGGGCTGGTAAGG   |
| novel_circ_000060 | forward primer | TGATGTTGGTGGTCATAC   |
|                   | reverse primer | AGACAGCCTTATAGTTTTG  |
| novel_circ_000346 | forward primer | ATTTCTCGGAAGTTGCTC   |
|                   | reverse primer | TTCCCAGTTTATTTTGTCTA |
| novel_circ_000071 | forward primer | TCAATGGACTTCCCAAAT   |
|                   | reverse primer | AGACACCACGGGTACAGC   |
| novel_circ_000098 | forward primer | TCAATGGACTTCCCAAAT   |
|                   | reverse primer | AGACACCACGGGTACAGC   |
| novel_circ_000123 | forward primer | TGGATTTGGGCAAGGAAG   |
|                   | reverse primer | CCACCGCCACCAACACTA   |
| novel_circ_000147 | forward primer | GATGGCTTATGGACATTC   |
|                   | reverse primer | TTTACAAAGGCTTGGAGA   |
| novel_circ_000214 | forward primer | CCGAGTGAGGAGACAAAG   |
|                   | reverse primer | CGGAGAAAGGAGCAGGAT   |
| novel_circ_000240 | forward primer | ATGGGAGGTGGAGATGGTG  |
|                   | reverse primer | CTCGGATTCGCAACTGGA   |
| novel_circ_000245 | forward primer | CTGTTGAAGCTGCCTTTG   |
|                   | reverse primer | GCTATTGACAACCTGCTAT  |

|                   |                |                      |
|-------------------|----------------|----------------------|
| novel_circ_000254 | forward primer | TCGGATGGAAGAACGGGTGA |
|                   | reverse primer | GGCCATGTTCGGCACAAC   |

Table S10. Primers used for cloning

| Gene name                   | Primers | Sequence information (5'-3')    |
|-----------------------------|---------|---------------------------------|
| <i>MaSPL3</i>               | F1      | ATGATGGAGTGGAATTCAAAAG          |
|                             | R1      | TATTCCCATCACTTCAAGTAG           |
| pET-20b (+) - <i>MaSPL3</i> | F2      | gccatATGATGGAGTGGAATTCAAAAG     |
|                             | R2      | ccctcgagggTATTCCCATCACTTCAAGTAG |

Supplementary Figures

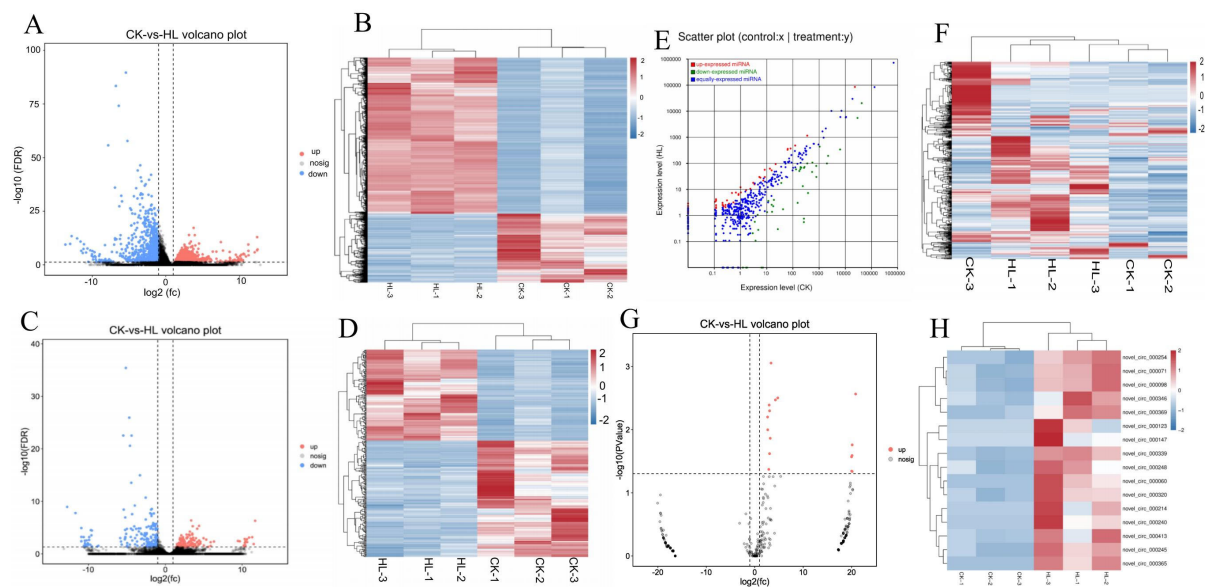

Figure S1. Volcan plot and heat maps showing the distribution pattern of the DEGs of the ceRNAs. (A, B) mRNAs, (C, D) lncRNAs, (E, F) miRNAs, (G, H) circRNAs.

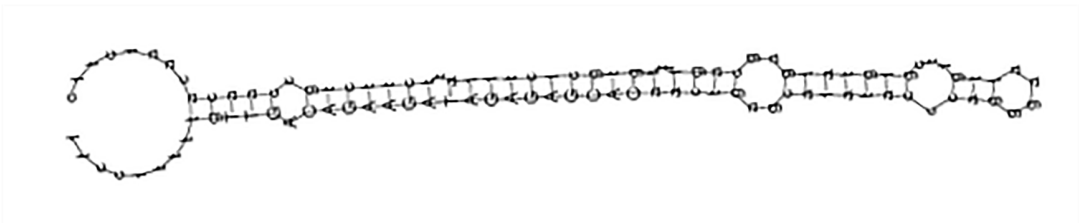

Figure S2. The secondary structure of pre-miR156x in mulberry

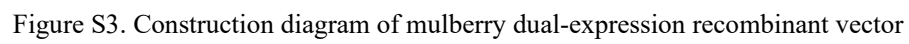

Figure S3. Construction diagram of mulberry dual-expression recombinant vector

```

10      20      30      40      50      60
1  ATGGAGTGGGAATTCAAAAGCTTCCTCATTATGGGACTGGGAGAACCTTTTGTGAGCTTGAG
1  M E W N S K A S S L W D W E N L F E L E
70      80      90      100     110     120
61  GCGAAAGCAACCGAGAATCCTAAGAAGCTACTACAACGAATGGATTGCTTTGTTGAAGTA
21  A K A T E N P K K L L Q R M D C F V E V
130     140     150     160     170     180
121  GATCGAGGAATAGCTCCGATCTCTCCATTACCTGGGATGCTGGGGGTAGCAGCGCA
41  D R G I S S G S L H S P G D G G S S A
190     200     210     220     230     240
181  GGAACCGGTGGTTTCAGTTCCGATTGGGTCTGCTTCATCGAAGAGCTCCATATCGGCT
61  G T G G S G S D L G H A S S K S S I S A
250     260     270     280     290     300
241  TCCATCAATTCTTCATCAATTGGGGAAGCAAGACATCCAACAAATTTACTCTCGACGGT
81  S I N S S S I G E S K T S N K F T L D G
310     320     330     340     350     360
301  TTCGAACCTTTTCCAAAGGATTCAAGGAGTGAAGTCTGCCCGAGTTCAACAACCT
101  F E P F P K D S R S E N E S A R V Q Q P
370     380     390     400     410     420
361  AGATCTTCACCAACCTGAAATTCAGCTGGCTCTGGTGAGCCATTGCTCAGTTTAAAG
121  R S S P T P E I S A G S G E P L L S L K
430     440     450     460     470     480
421  TTGGGCAAGCGGATGTACTTCAAAGATATTTGTTCAAGAAACAACGCCAAGTCATCCTCA
141  L G K R M Y F K D I C S E N N A K S S
490     500     510     520     530     540
481  GCCCGCTCTGTAGCACCATGTCTCTGACACGCTAAGAGAGCAAGTCCACTGC
161  A P S V A P M S S A T T A K R S K S T C
550     560     570     580     590     600
541  CAGAGTAATTCATGCTCTGCTGCCAAGTTGAAGGCTGCAACCTTGATCTTTCCTCGGCA
181  Q S N F M P R C Q V E G C N L D L S S A
610     620     630     640     650     660
601  AAAGATTACCATCGAAGCATAGAATTTGTGAAGTCATTCCAATCTCCAAGGTCATT
201  K D Y H R K H R I C E S H S K S P R V I
670     680     690     700     710     720
661  GTAGCGGTGTGGAGCGTCCGTTTTCGACAGTGTAGCAGGTTCACCGGTCTGTCTGAA
221  V G G V E R R F C Q Q C S R F H G L S E
730     740     750     760     770     780
721  TTTGATGAAAAGAGAGAGCTGTGGAAGACGTCTTCAGATCACAACGCAAGGCGCGCG
241  F D E K K R S C R R R L S D H N A R R R
790     800     810     820     830     840
781  AAGCCACAGCTGAAGCGTCCGTTTAAATCCAGCGAGCTTTCTTCACTATATGACGAG
261  K P Q P E A V R L N P A R L S S L Y D E
850     860     870     880     890     900
841  ACACAGAAGATGAGCCTTGTGTTTGACCAAGCCCGCGCTTTATACAAGGCATGCTGCA
281  T Q K M S L V F D Q A P R L Y T R H A A
910     920     930     940     950     960
901  AATTTTACATGGGATCATAGCACTGATAGCTCTAAGTTGGCGCATACAAGAGAGTACTTG
301  N F T W D H S T D S S K L A H T R E Y L
970     980     990     1000    1010    1020
961  TCAAGCCCTGCGAAAACAGGAGCCGACCTGGACAGATTTTTCGCCCACCAATGAAATG
321  S R P A K T G A A P G Q I F L P N N E M
1030    1040    1050    1060    1070    1080
1021  CCTAGCAGTATTTCCATGCTTTATCCTCAGGATCCGCTAGACTAACGCCAATAAAAC
341  P S S I S M L Y P Q D S G R L T P N K N
1090    1100    1110    1120    1130    1140
1081  ACTGCCCTGAGGTTCTCCACTCAGGGTTAGAAGATCTGTGGTGTGACAGAGCTAAAT
361  T A P E V L H S G L E E S V V S T E L N
1150    1160    1170    1180    1190    1200
1141  GCGACAGGATCTTCATCGTCTCTCTCTTCTGTCAACTAGTTCATGCTTTCGCGC
381  A T Q D L H R A L S L L S T S S W C S R
1210    1220    1230    1240    1250    1260
1201  GAAACAAAGATTGTTTCTCTAGATACTTGTCTACCGGCTCAACAACACAATCACCAT
401  E T K I V S L D T C S T A L N N T N H H
1270    1280    1290    1300    1310    1320
1261  AGCAGCTGCAGCAACGGCATGGTTCAACCGCGATGCATCAATGACCACCACAGACT
421  S S C S N G M V Q P A M H Q M T T T Q T
1330    1340    1350    1360    1370    1380
1321  CAAGGCTTCCCTTTTGTTCAGAGTTCTGGCAGACCCCAACAGCCACAGCTATTGATGCG
441  Q G F P F A S E F W Q T Q Q P T A I D A
1390    1400    1410    1420    1430    1440
1381  GCATTTCCACTACCCCCACACAGCAGTAATAGTAATGCCAATGCCACCACCCACTTT
461  A F P P T P H T R S N S N A N A T T H F
1450    1460    1470    1480    1490    1500
1441  CAAGATCTCATTTGATCAAACTCCCGGTGACACTGCTTTTATTCCCATCACTTCAAG
481  Q D L H L I K P P G D T A F Y S H H F K
1501  TAG
501  *

```

Figure S4. The nucleotide and deduced amino acids sequence of mulberry MaSPL3

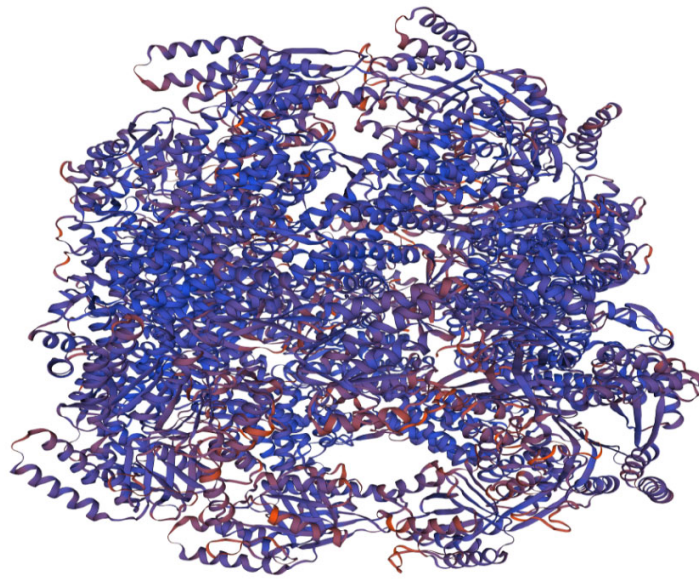

Figure S5. The protein tertiary structure of mulberry *MaSPL3*

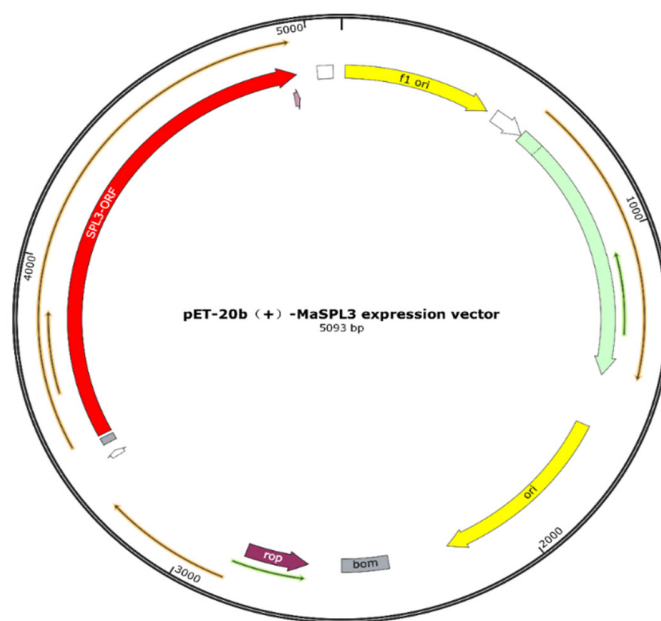

Figure S6. Construction diagram of prokaryotic expression vector pET-20b (+) - *MaSPL3* of mulberry
